# Supplementary material for: Mutational profiling reveals PIK3CA mutations in gallbladder carcinoma
Source: BMC Cancer. 2011 Feb 8;11:60. doi: 10.1186/1471-2407-11-60 (PMC3045359; doi:10.1186/1471-2407-11-60)
Supplement: Additional file 1 — Supplementary Table 1-3. Table S1: All mutations included in initial OncoMap screen. Table S2: Listing of mutations identified in initial OncoMap screening. 115 candidate mutations across 24 genes in 65% (47/72) of samples were identified. These were then ranked into two groups based on the mass spectrometric profiles and the likelihood that these represent true mutations referred to as conservative and aggressive "calls" which comprised 10% (12/115) and 90% (103/115) of possible mutations, respectively. Table S3: Candidate mutations across 12 genes (ABL1, APC, BRAF, EGFR, FGFR3, FLT3, KIT, KRAS, NRAS, PDGFRA, PIK3CA, MYC,) screened in hME validation assay on non WGA DNA using independent primers and probes. [file 1471-2407-11-60-S1.XLS]

## Sheet: Table 1_OM3 core sites
Mutations inlcuded in initial OncoMap Screen
GENE_SYMBOL	AA_CHANGE
ABL1	D276G
ABL1	E255K
ABL1	E255V
ABL1	E355G
ABL1	F317L
ABL1	F359V
ABL1	G250E
ABL1	H396R
ABL1	L248V
ABL1	M244V
ABL1	M351T
ABL1	Q252H
ABL1	Y253F
ABL1	Y253H
AKT1	E17K
AKT2	R371H
AKT2	S302G
APC	E1306*
APC	E1309fs*4
APC	E1309fs*6
APC	E1379*
APC	Q1338*
APC	Q1367*
APC	Q1378*
APC	Q1429*
APC	R1114*
APC	R1450*
APC	R1450*
APC	R876*
APC	S1465fs*3
APC	T1667fs*9
BRAF	D587A
BRAF	D587E
BRAF	D594E
BRAF	D594G
BRAF	D594V
BRAF	E586K
BRAF	F595L
BRAF	F595S
BRAF	G464E
BRAF	G464R
BRAF	G464V
BRAF	G466A
BRAF	G466E
BRAF	G466R
BRAF	G466V
BRAF	G466V
BRAF	G469A
BRAF	G469E
BRAF	G469R
BRAF	G469R
BRAF	G469S
BRAF	G469V
BRAF	G596R
BRAF	I592M
BRAF	I592V
BRAF	K601del
BRAF	K601E
BRAF	K601N
BRAF	L597Q
BRAF	L597R
BRAF	L597S
BRAF	L597V
BRAF	N581S
BRAF	R444W
BRAF	S605F
BRAF	S605N
BRAF	T599_V600insTT
BRAF	T599I
BRAF	V471F
BRAF	V600A
BRAF	V600D
BRAF	V600E
BRAF	V600L
BRAF	V600M
BRAF	V600R
CDK4	R24H
CDKN2A	D108Y
CDKN2A	D84Y
CDKN2A	E61*
CDKN2A	E61*
CDKN2A	E69*
CDKN2A	E69*
CDKN2A	E88*
CDKN2A	E88*
CDKN2A	H83Y
CDKN2A	H83Y
CDKN2A	P114L
CDKN2A	R58*
CDKN2A	R80*
CDKN2A	R80*
CDKN2A	W110*
CSF1R	L301*
CSF1R	L301S
CSF1R	Y969*
CSF1R	Y969*
CSF1R	Y969C
CSF1R	Y969F
CSF1R	Y969H
CTNNB1	A13T
CTNNB1	A21T
CTNNB1	D32A
CTNNB1	D32G
CTNNB1	D32H
CTNNB1	D32N
CTNNB1	D32V
CTNNB1	D32Y
CTNNB1	D32Y
CTNNB1	G34E
CTNNB1	G34R
CTNNB1	G34V
CTNNB1	G34V
CTNNB1	S33C
CTNNB1	S33F
CTNNB1	S33F
CTNNB1	S33Y
CTNNB1	S33Y
CTNNB1	S37A
CTNNB1	S37C
CTNNB1	S37F
CTNNB1	S37P
CTNNB1	S37Y
CTNNB1	S45A
CTNNB1	S45C
CTNNB1	S45F
CTNNB1	S45F
CTNNB1	S45P
CTNNB1	S45Y
CTNNB1	T41A
CTNNB1	T41I
CTNNB1	T41P
CTNNB1	T41S
CTNNB1	V22_G38del
CTNNB1	V22A
CTNNB1	W25_D32del
EGFR	A750P
EGFR	D761N
EGFR	D761Y
EGFR	D770_N771insG
EGFR	D770_N771insN
EGFR	E734K
EGFR	E746_A750>V
EGFR	E746_A750del
EGFR	E746_S752>A
EGFR	E746_S752>D
EGFR	E746_T751>A
EGFR	E746_T751del
EGFR	E746K
EGFR	G719A
EGFR	G719C
EGFR	G719D
EGFR	G719S
EGFR	G735S
EGFR	G810D
EGFR	G810S
EGFR	H773R
EGFR	K745R
EGFR	L730F
EGFR	L747_A750>P
EGFR	L747_E749del
EGFR	L747_P753>Q
EGFR	L747_P753>S
EGFR	L747_R748>FP
EGFR	L747_S752del
EGFR	L747_T751>P
EGFR	L747_T751>S
EGFR	L747_T751del
EGFR	L858M
EGFR	L858M
EGFR	L858R
EGFR	L858R
EGFR	N771_P772>SVDNR
EGFR	p.E746_A750del
EGFR	P733L
EGFR	P753S
EGFR	P772_H773insV
EGFR	S752_I759del
EGFR	S752_I759del
EGFR	S752Y
EGFR	T790M
EGFR	T790M
EGFR	V742A
EGFR	W731*
ERBB2	D769H
ERBB2	G776S
ERBB2	G776VC
ERBB2	L755P
ERBB2	L755S
ERBB2	V777L
ERBB2	V777L
FGFR1	P252T
FGFR1	S125L
FGFR2	C382R
FGFR2	K310R
FGFR2	N549K
FGFR2	N549K
FGFR2	S252W
FGFR2	S372C
FGFR2	Y375C
FGFR3	G370C
FGFR3	G370C
FGFR3	G697C
FGFR3	K650Q
FGFR3	L794fs*23
FGFR3	R248C
FGFR3	R248C
FGFR3	S249C
FGFR3	S371C
FGFR3	Y373C
FLT3	D835del
FLT3	D835E
FLT3	D835E
FLT3	D835H
FLT3	D835V
FLT3	D835Y
FLT3	D835Y
FLT3	I836del
FLT3	I836M
FLT3	Y572C
HRAS	G12C
HRAS	G12D
HRAS	G12R
HRAS	G12V
HRAS	G12V
HRAS	G13C
HRAS	G13C
HRAS	G13R
HRAS	G13S
HRAS	Q61H
HRAS	Q61H
HRAS	Q61K
HRAS	Q61L
HRAS	Q61L
HRAS	Q61P
HRAS	Q61R
HRAS	Q61R
JAK2	V617F
JAK2	V617F
JAK3	A572V
JAK3	P132T
JAK3	V722I
KIT	D52N
KIT	D816H
KIT	D816V
KIT	D816V
KIT	D816Y
KIT	D816Y
KIT	E839K
KIT	E839K
KIT	K550_K558del
KIT	K558_E562del
KIT	K558_V560del
KIT	K642E
KIT	L576P
KIT	N822K
KIT	N822K
KIT	P585P
KIT	T670I
KIT	V559A
KIT	V559D
KIT	V559del
KIT	V559G
KIT	V559I
KIT	V560D
KIT	V560G
KIT	V654A
KIT	V825A
KIT	W557G
KIT	W557R
KIT	W557R
KIT	Y503_F504insAY
KRAS	A146T
KRAS	A146T
KRAS	A59T
KRAS	G12A
KRAS	G12A
KRAS	G12C
KRAS	G12C
KRAS	G12D
KRAS	G12D
KRAS	G12R
KRAS	G12R
KRAS	G12S
KRAS	G12S
KRAS	G12V
KRAS	G12V
KRAS	G13A
KRAS	G13A
KRAS	G13C
KRAS	G13C
KRAS	G13D
KRAS	G13D
KRAS	G13R
KRAS	G13R
KRAS	G13S
KRAS	G13S
KRAS	G13V
KRAS	G13V
KRAS	L19F
KRAS	L19F
KRAS	Q22K
KRAS	Q22K
KRAS	Q61E
KRAS	Q61E
KRAS	Q61H
KRAS	Q61H
KRAS	Q61H
KRAS	Q61H
KRAS	Q61K
KRAS	Q61K
KRAS	Q61L
KRAS	Q61L
KRAS	Q61P
KRAS	Q61P
KRAS	Q61R
KRAS	Q61R
MET	H1112R
MET	H1112Y
MET	M1268T
MET	T1010I
MET	Y1248C
MET	Y1248H
MLH1	V384D
MYC	A59V
MYC	N101T
MYC	P260A
MYC	P57S
MYC	S77F
MYC	T73I
NRAS	A18T
NRAS	G12A
NRAS	G12C
NRAS	G12C
NRAS	G12D
NRAS	G12D
NRAS	G12R
NRAS	G12S
NRAS	G12S
NRAS	G12V
NRAS	G13A
NRAS	G13C
NRAS	G13C
NRAS	G13D
NRAS	G13D
NRAS	G13R
NRAS	G13R
NRAS	G13S
NRAS	G13V
NRAS	G13V
NRAS	Q61E
NRAS	Q61H
NRAS	Q61H
NRAS	Q61K
NRAS	Q61K
NRAS	Q61L
NRAS	Q61L
NRAS	Q61P
NRAS	Q61R
NRAS	Q61R
PDGFRA	D842_D846>E
PDGFRA	D842_D846>G
PDGFRA	D842_D846>N
PDGFRA	D842_H845>V
PDGFRA	D842_H845del
PDGFRA	D842_M844del
PDGFRA	D842_S847>EA
PDGFRA	D842I
PDGFRA	D842V
PDGFRA	D842Y
PDGFRA	D842Y
PDGFRA	D846Y
PDGFRA	I843_D846del
PDGFRA	I843_S847>T
PDGFRA	R841_D842del
PDGFRA	S566_E571>K
PDGFRA	S566_E571>R
PDGFRA	S566_E571>R
PIK3CA	C420R
PIK3CA	E542K
PIK3CA	E542K
PIK3CA	E545A
PIK3CA	E545G
PIK3CA	E545K
PIK3CA	E545K
PIK3CA	H1047L
PIK3CA	H1047R
PIK3CA	H1047R
PIK3CA	H1047Y
PIK3CA	H701P
PIK3CA	N1068fs*4
PIK3CA	N345K
PIK3CA	P539R
PIK3CA	R88Q
PIK3CA	Y1021C
PTEN	K267fs*9
PTEN	K6fs*4
PTEN	N323fs*2
PTEN	N323fs*21
PTEN	P248fs*5
PTEN	R130*
PTEN	R130fs*4
PTEN	R130G
PTEN	R130Q
PTEN	R173C
PTEN	R173H
PTEN	R233*
PTEN	R335*
PTEN	V317fs*3
RB1	C706F
RB1	E137*
RB1	E748*
RB1	L199*
RB1	L660fs*2
RB1	L660fs*2
RB1	R320*
RB1	R358*
RB1	R455*
RB1	R552*
RB1	R556*
RB1	R579*
RET	A883F
RET	C634R
RET	C634W
RET	C634Y
RET	D631_L633>E
RET	D631G
RET	D898_E901del
RET	E632_A640>VRP
RET	E632_L633>V
RET	E632_L633del
RET	E768D
RET	F612_C620del
RET	M918T
SRC	Q531*
STK11	D194N
STK11	D194V
STK11	E199*
STK11	E199K
STK11	E57fs*7
STK11	F264fs*22
STK11	G196V
STK11	P281fs*6
STK11	P281L
STK11	Q170*
STK11	Q37*
STK11	W332*
TP53	G245S
TP53	R175H
TP53	R248Q
TP53	R248W
TP53	R273C
TP53	R273H
TP53	R306*
VHL	F148fs*11
VHL	L158Q
VHL	L85P
VHL	L89H
VHL	P81S
VHL	R161*
VHL	R167W

## Sheet: Table 2 candidate mutations
	Yellow indicates calls where >1 candidate mutation call was made in iPLEX
	Frequency of occurrence of candidate mutations
	Gene	Mutation	total # calls with candidate mutation	# conservative calls	# aggressive calls
	KRAS	G13S	9	0	9
	NRAS	G13C	6	0	6
	PIK3CA	E545K	5	2	3
	ABL1	E255K	4	2	2
	MLH1	V384D	4	0	4
	APC	R876*	3	0	3
	EGFR	L747_P753>S	3	0	3
	FGFR3	S249C	3	1	2
	KIT	L576P	3	0	3
	KRAS	G12V	3	1	2
	NRAS	G12R	3	0	3
	VHL	R161*	3	0	3
	ABL1	G250E	2	0	2
	BRAF	S605N	2	0	2
	CDK4	R24H	2	0	2
	FLT3	D835del	2	2	0
	HRAS	G13S	2	0	2
	KIT	E839K	2	0	2
	KIT	V559del	2	0	2
	KRAS	G12D	2	0	2
	KRAS	Q61L	2	0	2
	MYC (C-MYC)	A59V (A44V)	2	1	1
	NRAS	G12D	2	0	2
	NRAS	Q61R	2	0	2
	PDGFRA	S566_E571>K	2	2	0
	PIK3CA	E542K	2	0	2
	PIK3CA	H1047Y	2	0	2
	PTEN	R130Q	2	0	2
	RB1	L660fs*2	2	0	2
	TP53	R273H	2	0	2
	ABL1	Y253F	1	0	1
	APC	Q1429*	1	0	1
	BRAF	E586K	1	0	1
	BRAF	S605F	1	0	1
	CDKN2A	R58*	1	0	1
	CDKN2A	R80*	1	0	1
	CSF1R (FMS)	Y969F	1	0	1
	CTNNB1	S45Y	1	0	1
	EGFR	P753S	1	0	1
	EGFR	W731*	1	0	1
	FGFR3	S371C	1	0	1
	HRAS	G12V	1	0	1
	JAK3	A572V	1	0	1
	KIT	D816V	1	0	1
	KIT	V560D	1	0	1
	KRAS	G12C	1	1	0
	KRAS	A59T	1	0	1
	KRAS	G12A	1	0	1
	MYC (C-MYC)	P57S	1	0	1
	MYC (C-MYC)	S77F (S62F)	1	0	1
	NRAS	G13S	1	0	1
	NRAS	Q61P	1	0	1
	PDGFRA	I843_S847>T	1	0	1
	PTEN	R173H	1	0	1
	PTEN	R335*	1	0	1
	RB1	R579*	1	0	1
	STK11	D194N	1	0	1
	STK11	F264fs*22	1	0	1
	STK11	P281L	1	0	1
	TP53	R273C	1	0	1
			115	12	103

## Sheet: Table 3_ hME validated mutation
hME validated mutations
Assay ID	Gene	Mutation
OM_00018	ABL1	G250E
OM_00021	ABL1	Y253F
OM_00022	ABL1	E255K
OM_00318	APC	Q1338*
OM_01094	APC	Q1429*
OM_01087	APC	R876*
OM_01087	APC	R876*
OM_01087	APC	R876*
OM_00050	BRAF	L597V
OM_00073	EGFR	L747_P753>S
OM_00130B	FGFR3	S249C
OM_00158	KIT	W557R
OM_00164	KIT	V560D
OM_00170	KIT	K558_E562del
OM_00171	KIT	V559del
OM_00176	KIT	L576P
OM_00180A	KIT	D816V
OM_00184A	KIT	E839K
OM_00188A	KRAS	G12V
OM_00189A	KRAS	G12S
OM_00190A	KRAS	G12A
OM_00191B	KRAS	G12D
OM_00192B	KRAS	G12C
OM_00193A	KRAS	G12R
OM_00197B	KRAS	G13S
OM_00199A	KRAS	A59T
OM_00200A	KRAS	Q61E
OM_00204A	KRAS	Q61L
OM_00214B	NRAS	G12D
OM_00217	NRAS	G12R
OM_00221A	NRAS	G13C
OM_00224	NRAS	Q61P
OM_00227A	NRAS	Q61R
OM_00238	PDGFRA	S566_E571>K
OM_00239	PDGFRA	I843_S847>T
OM_00245B	PIK3CA	E542K
OM_00246B	PIK3CA	E545K
OM_00251	PIK3CA	H1047Y
OM_00337	BRAF	E586K
OM_00347	BRAF	S605N
OM_00359	BRAF	S605F
OM_00404	MYC (C-MYC)	A59V (A44V)
OM_00405	MYC (C-MYC)	P57S
OM_00406	MYC (C-MYC)	S77F (S62F)
OM_00491	EGFR	W731*
OM_00502	EGFR	P753S
OM_00641	FGFR3	S371C
OM_00646	FGFR3	P795fs*139
OM_00677	FLT3	D835del
OM_00807A	NRAS	G13S
